# Supplementary material
Source: publisher figshare collection journal article supplement (https://tandf.figshare.com/articles/dataset/_/17919119)
Supplement: Supplementary file 1 [file 1]

Supplementary Table 1. Correlations between lncRNA ZFPM2-AS and clinicopathological characteristics in retinoblastoma

| Characteristics | N= 34 | ZFPM2-AS1 expression | | P |
| --- | --- | --- | --- | --- |
|  |  | High (N=17) | Low (N=17) |  |
| Age (years) |  |  |  |  |
| ≤14 | 18 | 8 | 10 | 0.732 |
| >14 | 16 | 9 | 7 |  |
| Gender |  |  |  |  |
| Male | 20 | 12 | 8 | 0.296 |
| Female | 14 | 5 | 9 |  |
| Laterality |  |  |  |  |
| Unilateral | 23 | 10 | 13 | 0.465 |
| Bilateral | 11 | 7 | 4 |  |
| Pathologic grade |  |  |  |  |
| Well differentiated | 12 | 5 | 7 | 0.721 |
| Poorly differentiated | 22 | 12 | 10 |  |
| Size |  |  |  |  |
| ≤10 mm | 13 | 3 | 10 | 0.032 |
| >10 mm | 21 | 14 | 7 |  |
| Choroidal invasion |  |  |  |  |
| Absent | 19 | 4 | 15 | 0.000 |
| Present | 15 | 13 | 2 |  |
| Optic nerve invasion |  |  |  |  |
| Absent | 20 | 5 | 15 | 0.001 |
| Present | 14 | 12 | 2 |  |

Fisher’s exact test was used for this study.
